# Supplementary figures and images for: Growth of inch-sized KCa0.8Sr0.2I3:Eu2+scintillating crystals and high performance for gamma-ray detection
Source: Royal Society of Chemistry journal article supplement (doi:10.1039/c6ce01410k), 2016-01-01

Supplementary Figure 1

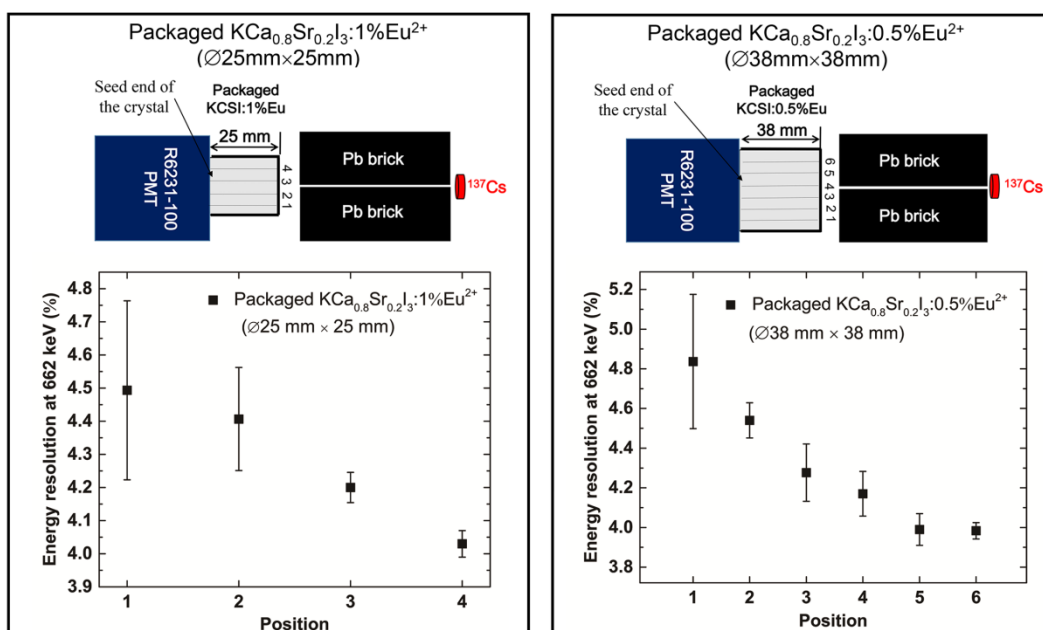

Supplement: c6ce01410k1.pdf [file c6ce01410k1.pdf]
